# Supplementary material for: The Impact of Mutations in the HvCPD and HvBRI1 Genes on the Physicochemical Properties of the Membranes from Barley Acclimated to Low/High Temperatures
Source: MDPI journal article supplement (doi:10.3390/cells9051125), 2020-05-01

**Figure S1.** Changes in the values of the  $A_{lim}$ ,  $\pi_{coll}$  and  $C_s^{-1}$  parameters for the barley brassinosteroid mutants (BW084 and BW312) and the WT Bowman growing at 5°C and 27°C in relation to 20 °C (when 20°C is expressed as 100%). (A, B, C) Data calculated for monolayers of monogalactosyldiacylglycerols (MGDG); (D, E, F) Data calculated for monolayers of digalactosyldiacylglycerols (DGDG); (G, H, I) Data calculated for monolayers of phospholipids (PL).

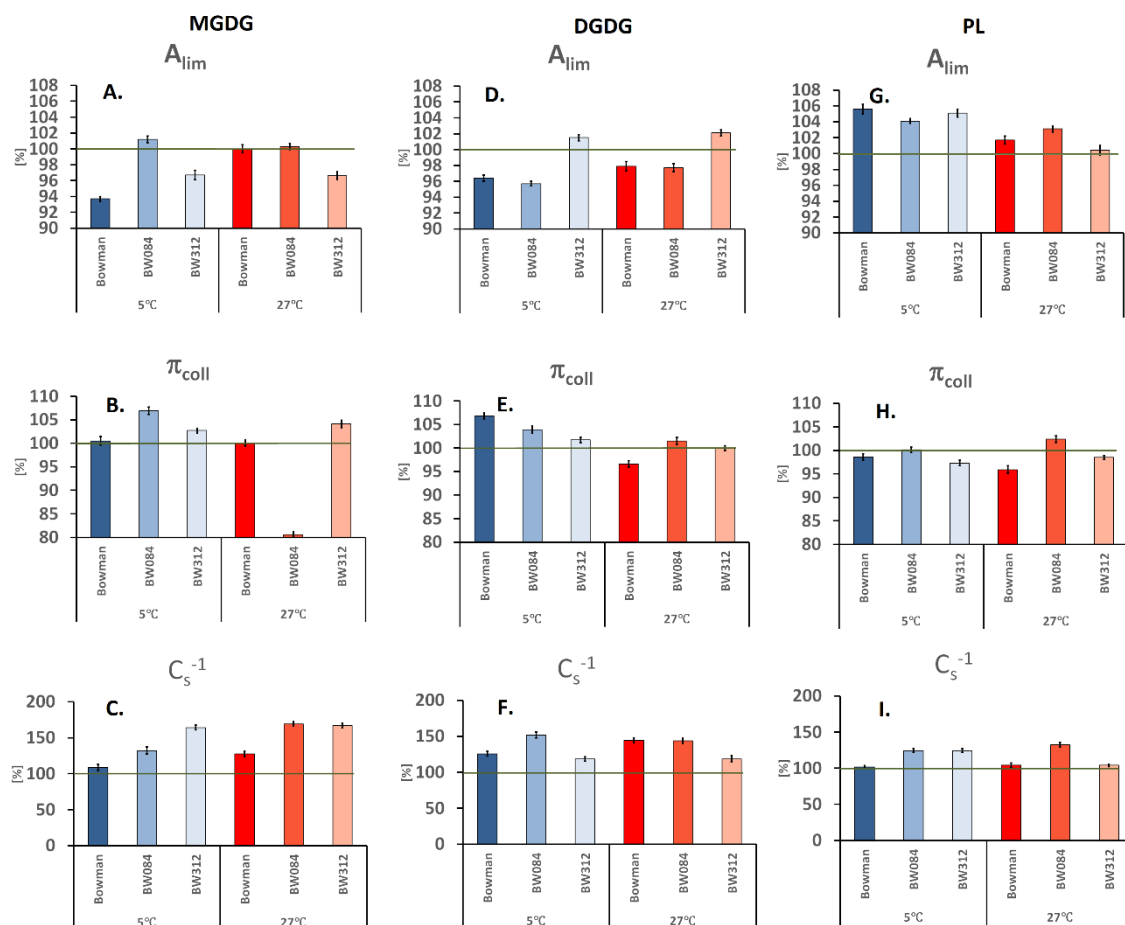

Supplement: s1 [file s1]
